# Supplementary material
Source: HighWire-hosted journal article supplement (https://jnm.snmjournals.org/highwire/filestream/94941/field_highwire_adjunct_files/0/168732_Supplemental_Data.pdf)
Supplement: 168732_Supplemental_Data.pdf [file 168732_Supplemental_Data.pdf]

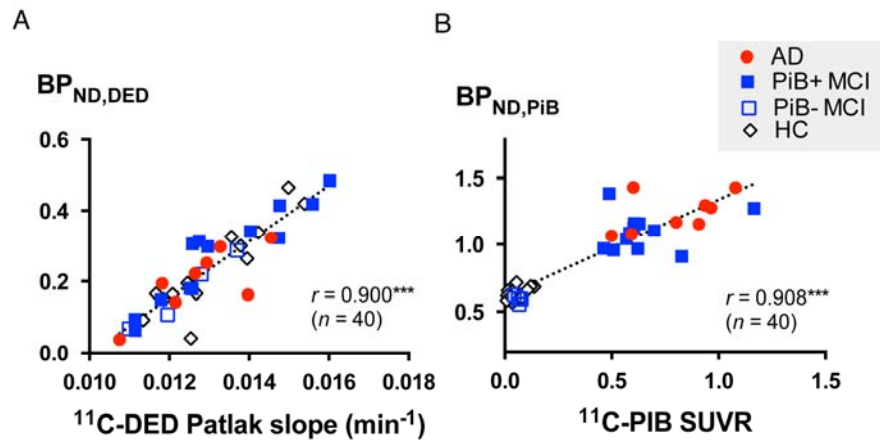

**SUPPLEMENTAL FIGURE 1. Inter-subject correlations of (A)  $^{11}C\text{-DED}$  and (B)  $^{11}C\text{-PiB}$  PET quantification approaches, performed in a neocortical (frontal, temporal, parietal) composite region;  $^{***}p < 0.001$ .**

AD = Alzheimer's disease;  $BP_{ND,DED}$  =  $^{11}C\text{-DED}$  binding potential;  $BP_{ND,PiB}$  =  $^{11}C\text{-PiB}$  binding potential;  $^{11}C\text{-DED}$  =  $^{11}C\text{-deuterium-L-deprenyl}$ ; HC = healthy control; MCI = mild cognitive impairment;  $^{11}C\text{-PiB}$  =  $^{11}C\text{-Pittsburgh compound-B}$ ; SRTM = simplified reference tissue model; SUVR = standardized uptake value ratio.

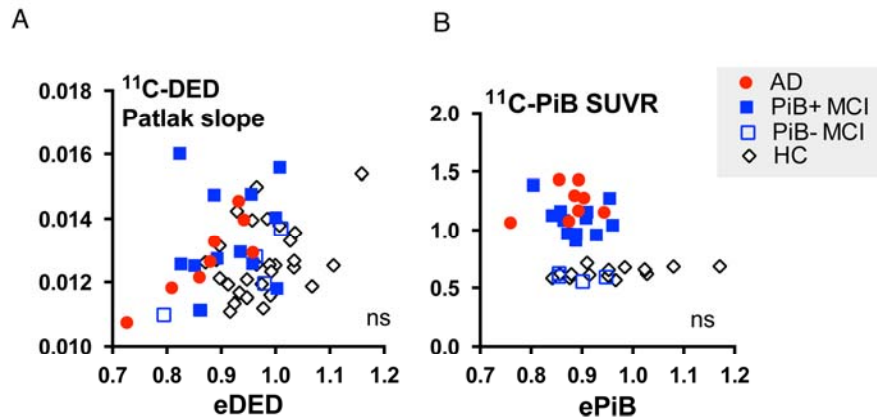

**SUPPLEMENTAL FIGURE 2. Inter-subject correlations of (A) eDED vs  $^{11}\text{C}$ -DED Patlak slope and (B) ePiB vs  $^{11}\text{C}$ -PiB SUVR in a neocortical (frontal, temporal, parietal) composite region; \*\*\* $p < 0.001$ .**

AD = Alzheimer's disease;  $^{11}\text{C}$ -DED =  $^{11}\text{C}$ -deuterium-L-deprenyl;  $^{11}\text{C}$ -PiB =  $^{11}\text{C}$ -Pittsburgh compound-B; eDED = early-phase  $^{11}\text{C}$ -DED; ePiB = early-phase  $^{11}\text{C}$ -PiB; HC = healthy control; MCI = mild cognitive impairment; ns = non-significant; SUVR = standardized uptake value ratio.

**SUPPLEMENTAL TABLE 1. Comparison of  $^{11}\text{C}$ -DED and  $^{11}\text{C}$ -PiB quantification methods.**

| <b>Inter-subject regional correlations<br/>(Pearson's <math>r</math>), <math>n = 40</math></b> |                                                                     |                                                             |
|------------------------------------------------------------------------------------------------|---------------------------------------------------------------------|-------------------------------------------------------------|
|                                                                                                | $^{11}\text{C}$ -DED Patlak slope<br>vs $\text{BP}_{\text{ND,DED}}$ | $^{11}\text{C}$ -PiB SUVR<br>vs $\text{BP}_{\text{ND,PiB}}$ |
| <b>Cortical regions</b>                                                                        |                                                                     |                                                             |
| Frontal                                                                                        | 0.813***                                                            | 0.874***                                                    |
| Parietal                                                                                       | 0.870***                                                            | 0.858***                                                    |
| Temporal                                                                                       | 0.909***                                                            | 0.836***                                                    |
| Occipital                                                                                      | 0.859***                                                            | 0.741***                                                    |
| Anterior cingulate                                                                             | 0.848***                                                            | 0.903***                                                    |
| Posterior cingulate                                                                            | 0.810***                                                            | 0.896***                                                    |
| Insula                                                                                         | 0.933***                                                            | 0.875***                                                    |
| Parahippocampus                                                                                | 0.942***                                                            | 0.588***                                                    |
| <b>Subcortical regions</b>                                                                     |                                                                     |                                                             |
| Caudate                                                                                        | 0.857***                                                            | 0.686***                                                    |
| Putamen                                                                                        | 0.880***                                                            | 0.860***                                                    |
| Thalamus                                                                                       | 0.873***                                                            | 0.569***                                                    |
| Hippocampus                                                                                    | 0.892***                                                            | 0.487**                                                     |

\*\* $p < 0.004$ , \*\*\* $p < 0.001$

$\text{BP}_{\text{ND,DED}}$  =  $^{11}\text{C}$ -DED binding potential;  $\text{BP}_{\text{ND,PiB}}$  =  $^{11}\text{C}$ -PiB binding potential;  $^{11}\text{C}$ -DED =  $^{11}\text{C}$ -deuterium-L-deprenyl;  $^{11}\text{C}$ -PiB =  $^{11}\text{C}$ -Pittsburgh compound-B; SRTM = simplified reference tissue model; SUVR = standardized uptake value ratio.

**SUPPLEMENTAL TABLE 2. Regional distribution of significant voxelwise positive Pearson's correlations (maximum C values) by biological parametric mapping, corrected by family-wise error (FWE) multiple comparisons at  $p < 0.05$ .**

|                                                  | eDED vs $^{18}\text{F}$ -FDG SUVR |              |                       |              | eDED vs $^{11}\text{C}$ -DED Patlak slope |              |                       |              |
|--------------------------------------------------|-----------------------------------|--------------|-----------------------|--------------|-------------------------------------------|--------------|-----------------------|--------------|
|                                                  | positive correlations             |              | positive correlations |              | positive correlations                     |              | positive correlations |              |
|                                                  | Left hemisphere                   |              | Right hemisphere      |              | Left hemisphere                           |              | Right hemisphere      |              |
|                                                  | Num. of voxels                    | Max. C value | Num. of voxels        | Max. C value | Num. of voxels                            | Max. C value | Num. of voxels        | Max. C value |
| <b>Superior parietal gyrus</b>                   |                                   |              | 24                    | 0.78         |                                           |              |                       |              |
| <b>Inferiolateral remainder of parietal lobe</b> | 558                               | 0.88         | 629                   | 0.85         |                                           |              |                       |              |
| <b>Superior temporal gyrus, posterior part</b>   |                                   |              | 61                    | 0.79         |                                           |              |                       |              |
| <b>Posterior temporal lobe</b>                   | 140                               | 0.84         | 1434                  | 0.86         |                                           |              | 31                    | 0.76         |
| <b>Middle and inferior temporal gyrus</b>        | 60                                | 0.84         | 370                   | 0.85         |                                           |              |                       |              |
| <b>Posterior cingulate</b>                       | 53                                | 0.80         | 26                    | 0.77         |                                           |              |                       |              |
| <b>Anterior cingulate</b>                        | 257                               | 0.87         | 128                   | 0.85         |                                           |              |                       |              |
| <b>Middle frontal gyrus</b>                      | 200                               | 0.80         |                       |              |                                           |              |                       |              |
| <b>Inferior frontal gyrus</b>                    | 149                               | 0.80         | 82                    | 0.82         | 26                                        | 0.79         | 13                    | 0.78         |
| <b>Superior frontal gyrus</b>                    | 407                               | 0.91         | 140                   | 0.86         |                                           |              |                       |              |
| <b>Posterior orbital gyrus</b>                   |                                   |              | 79                    | 0.84         |                                           |              |                       |              |
| <b>Thalamus</b>                                  | 52                                | 0.83         |                       |              | 23                                        | 0.77         | 23                    | 0.85         |
| <b>Caudate nucleus</b>                           | 35                                | 0.80         |                       |              | 81                                        | 0.83         | 144                   | 0.86         |
| <b>Insula</b>                                    |                                   |              | 147                   | 0.86         |                                           |              |                       |              |

eDED = early-phase  $^{11}\text{C}$ -DED;  $^{11}\text{C}$ -DED =  $^{11}\text{C}$ -deuterium-L-deprenyl;  $^{18}\text{F}$ -FDG =  $^{18}\text{F}$ -fluorodeoxyglucose; SUVR = standardized uptake value ratio.

**SUPPLEMENTAL TABLE 3. Regional distribution of significant voxelwise hypoperfusion and hypometabolism in the PiB+ MCI group compared to healthy controls by statistical parametric mapping (maximum T values), corrected by family-wise error (FWE) multiple comparisons at  $p < 0.05$ .**

|                                                  | Hypoperfusion in PiB+ MCI |              |                  |              | Hypometabolism in PiB+ MCI |              |                  |              |
|--------------------------------------------------|---------------------------|--------------|------------------|--------------|----------------------------|--------------|------------------|--------------|
|                                                  | Left hemisphere           |              | Right hemisphere |              | Left hemisphere            |              | Right hemisphere |              |
|                                                  | Num. of voxels            | Max. T value | Num. of voxels   | Max. T value | Num. of voxels             | Max. T value | Num. of voxels   | Max. T value |
| <b>Superior parietal gyrus</b>                   |                           |              |                  |              |                            |              | 21               | 6.13         |
| <b>Inferiolateral remainder of parietal lobe</b> | 145                       | 7.45         |                  |              | 102                        | 6.50         | 180              | 7.24         |
| <b>Superior temporal gyrus, posterior part</b>   |                           |              |                  |              | 95                         | 6.62         | 77               | 6.53         |
| <b>Middle and inferior temporal gyrus</b>        | 28                        | 6.95         |                  |              | 229                        | 6.80         | 456              | 7.17         |
| <b>Posterior temporal lobe</b>                   | 55                        | 7.58         |                  |              | 98                         | 6.60         | 444              | 8.21         |
| <b>Posterior cingulate</b>                       |                           |              |                  |              | 27                         | 6.12         | 164              | 6.90         |
| <b>Middle frontal gyrus</b>                      |                           |              |                  |              |                            |              | 125              | 6.16         |
| <b>Superior frontal gyrus</b>                    |                           |              |                  |              | 42                         | 6.10         |                  |              |
| <b>Lateral remainder of occipital lobe</b>       |                           |              |                  |              |                            |              |                  |              |
| <b>Postcentral gyrus</b>                         |                           |              |                  |              |                            |              |                  |              |
| <b>Thalamus</b>                                  |                           |              |                  |              | 23                         | 6.16         |                  |              |
| <b>Parahippocampal and ambient gyri</b>          |                           |              | 25               | 7.84         |                            |              |                  |              |

PiB+ MCI = PiB positive mild cognitive impairment.

**SUPPLEMENTAL TABLE 4. Regional distribution of significant voxelwise hypoperfusion and hypometabolism in the AD group compared to healthy controls by statistical parametric mapping (maximum T values), corrected by family-wise error (FWE) multiple comparisons at  $p < 0.05$ .**

|                                                  | Hypoperfusion in AD |              |                  |              | Hypometabolism in AD |              |                  |              |
|--------------------------------------------------|---------------------|--------------|------------------|--------------|----------------------|--------------|------------------|--------------|
|                                                  | Left hemisphere     |              | Right hemisphere |              | Left hemisphere      |              | Right hemisphere |              |
|                                                  | Num. of voxels      | Max. T value | Num. of voxels   | Max. T value | Num. of voxels       | Max. T value | Num. of voxels   | Max. T value |
| <b>Superior parietal gyrus</b>                   | 38                  | 7.46         |                  |              | 150                  | 7.57         | 179              | 7.89         |
| <b>Inferiolateral remainder of parietal lobe</b> | 800                 | 11.17        | 77               | 6.99         | 1098                 | 8.77         | 495              | 9.39         |
| <b>Superior temporal gyrus, posterior part</b>   |                     |              |                  |              |                      |              |                  |              |
| <b>Middle and inferior temporal gyrus</b>        | 67                  | 7.99         |                  |              | 433                  | 8.33         | 177              | 6.89         |
| <b>Posterior temporal lobe</b>                   | 514                 | 9.54         | 41               | 7.36         | 841                  | 8.23         | 606              | 10.15        |
| <b>Posterior cingulate</b>                       |                     |              |                  |              |                      |              | 75               | 6.70         |
| <b>Middle frontal gyrus</b>                      |                     |              |                  |              |                      |              |                  |              |
| <b>Superior frontal gyrus</b>                    |                     |              |                  |              | 54                   | 7.41         |                  |              |
| <b>Lateral remainder of occipital lobe</b>       | 91                  | 8.63         |                  |              | 37                   | 6.68         |                  |              |
| <b>Postcentral gyrus</b>                         | 22                  | 7.53         |                  |              |                      |              |                  |              |
| <b>Thalamus</b>                                  |                     |              |                  |              | 27                   | 7.27         |                  |              |
| <b>Parahippocampal and ambient gyri</b>          |                     |              |                  |              |                      |              |                  |              |

AD = Alzheimer's disease.

**SUPPLEMENTAL TABLE 5. Discriminative ability of eDED, ePiB and <sup>18</sup>F-FDG SUVR by ROC analyses.**

| AD vs HC                  | AUC from ROC analyses<br>[95% CI] |                  |                  | Statistical<br>comparison of AUC<br>values (DeLong's<br>test p-values) |                            |
|---------------------------|-----------------------------------|------------------|------------------|------------------------------------------------------------------------|----------------------------|
|                           | <sup>18</sup> F-FDG<br>SUVR       | eDED             | ePiB             | eDED vs<br><sup>18</sup> F-FDG<br>SUVR<br>p-value                      | eDED vs<br>ePiB<br>p-value |
| Parietal                  | 0.97 [0.83-1]                     | 0.93 [0.83-1]    | 0.84 [0.66-1]    | 0.43                                                                   | 0.37                       |
| Temporal                  | 0.97 [0.91-1]                     | 0.93 [0.82-1]    | 0.90 [0.76-1]    | 0.43                                                                   | 0.72                       |
| <b>PiB+ MCI<br/>vs HC</b> |                                   |                  |                  |                                                                        |                            |
| Parietal                  | 0.90 [0.77-1]                     | 0.78 [0.61-0.96] | 0.77 [0.59-0.96] | 0.22                                                                   | 0.96                       |
| Temporal                  | 0.96 [0.90-1]                     | 0.87 [0.74-0.1]  | 0.77 [0.58-0.95] | 0.20                                                                   | 0.25                       |

AD = Alzheimer's disease patients (*n*=8); AUC = area under the curve; eDED = early-phase <sup>11</sup>C-deuterium-L-deprenyl; ePiB = early-phase <sup>11</sup>C-Pittsburgh compound-B; <sup>18</sup>F-FDG = <sup>18</sup>F-fluorodeoxyglucose; HC = healthy control group (*n*=16); PiB+ MCI = PiB-positive mild cognitive impairment patients (*n*=13); ROC = receiver operating characteristic; SUVR = standardized uptake value ratio.
